# Supplementary material
Source: PubMed Central journal article supplement (PMC8064582)
Supplement: NIHMS1690227-supplement-Supplementary-material-IsRNA1.pdf [file NIHMS1690227-supplement-Supplementary-material-IsRNA1.pdf]

## Supporting Information

### **IsRNA1: *de novo* prediction and blind screening of RNA 3D structures**

Dong Zhang, Jun Li and Shi-Jie Chen

Department of Physics, Department of Biochemistry, and Institute of Data Science and Informatics, University of Missouri, Columbia, Missouri, 65211, USA

## Section I: Energy functions in coarse-grained force field

The energy functions for three local covalent energy terms in the coarse-grained (CG) force field (Eq. 1 in the main text) have the following functional forms:

$$E_{bond}(b) = K_b(b - b_0)^2 + \frac{H_b}{\sqrt{2\pi}\sigma_b} e^{-0.5(b-b_1)^2/\sigma_b^2} \quad (S1)$$

$$E_{angle}(\theta) = K_a(\theta - \theta_0)^2 + \frac{H_a}{\sqrt{2\pi}\sigma_a} e^{-0.5(\theta-\theta_1)^2/\sigma_a^2} \quad (S2)$$

$$E_{torsion}(\phi) = \sum_{n=1}^4 K_n [1 + \cos(n\phi - \phi_n)] \quad (S3)$$

where  $b$ ,  $\theta$  and  $\phi$  denote the bond stretching length between two connected beads, the bond angle between two adjacent bonds, and the torsion angle between three successive bonds, respectively. Parameters  $K_b$ ,  $b_0$ ,  $H_b$ ,  $\sigma_b$ , and  $b_1$  in Eq. S1 describe the strength of bond stretching and the equilibrium bond length. Parameters  $K_a$ ,  $\theta_0$ ,  $H_a$ ,  $\sigma_a$ , and  $\theta_1$  in Eq. S2 characterize the bending energy of the bond angle and the equilibrium bond angle.  $K_n$  and  $\phi_n$  ( $n = 1, 2, 3, 4$ ) in Eq. S3 are related to the local minima on the profile of the torsional energy. Those energy parameters were determined using the iterative simulated reference state approach, and their detailed values are given in Table S3~S5, respectively. Compared to the widely used harmonic potentials for bond stretching and bond angle terms in previous CG models, extra Gaussian terms are introduced in Eqs. S1 and S2 in order to capture more precise details of the statistical potential and to enable broader sampling of the backbone conformations in simulations.

The non-local term  $E_{pair}(r)$  that accounts for non-canonical base pairing, base stacking, base-backbone, and backbone-backbone interactions in the CG force field is written as:

$$E_{pair}(r) = D_0 [e^{-2\alpha(r-r_0)} - 2e^{-\alpha(r-r_0)}] + \frac{H_1}{\sqrt{2\pi}\sigma_1} e^{-\frac{(r-r_1)^2}{2\sigma_1^2}} + \frac{H_2}{\sqrt{2\pi}\sigma_2} e^{-\frac{(r-r_2)^2}{2\sigma_2^2}}, r < r_{cut} \quad (S4)$$

Here  $r$  is the pairwise distance between two non-neighboring beads (not involved in the same one bond, bond angle, and torsion angle). The first Morse potential term in Eq. S4 is designed to give the overall shape of the knowledge-based energies, while

the latter two Gaussian terms account for local features of the energy profiles. All the energy parameters  $D_0$ ,  $\alpha$ ,  $r_0$ ,  $H_1$ ,  $\sigma_1$ ,  $r_1$ ,  $H_2$ ,  $\sigma_2$ ,  $r_2$ , and the cut-off distance  $r_{cut}$  for different types of pairwise interactions were determined by the iterative simulated reference state approach, and the detailed values are listed in Table S6.

The last term  $E_{LJ}(r)$  in the CG force field (Eq. 1 in the main text) describes the excluded volume interaction between any two non-neighboring beads (not involved in the same bond, bond angle, and torsion angle) through the repulsive Lennard-Jones potential

$$E_{LJ}(r) = \varepsilon \left[ \left( \frac{\sigma}{r} \right)^{12} - \left( \frac{\sigma}{r} \right)^6 \right], \quad r < \sigma \quad (\text{S5})$$

Here, the energy constant is set to  $\varepsilon = 0.5 \text{ kcal/mol}$ , and  $\sigma = (\sigma_i + \sigma_j)/2$  is for the interaction between the  $i$ -th and  $j$ -th types of CG beads with diameters  $\sigma_i$  and  $\sigma_j$  (see Table S1 for details), respectively.

## Section II: Accounting for energy correlation between different structural elements

As shown in Fig. S1, for some structural element, such as the bond angle  $x = \theta_2(G_0 - R_C - G_N)$ , whose conformation is fixed by the strong chain connectivity constraints (bond stretching energies), the distribution  $p_{ref}(\theta_2)$  in the coarse-grained Molecular Dynamics (CGMD) simulation generated reference state would match the observed statistics  $p_{obs}(\theta_2)$ , and we have  $E(\theta_2) \approx 0$  according to Eq S6. In this case, this structural parameter should not be included in the coarse-grained force field in order to avoid redundancy. As a result, not all the structural elements need to be selected as collective variables in the final coarse-grained force field. For other structural parameters like bond angle  $x = \theta_1(S - R_C - G_O)$ , the distribution  $p_{ref}(\theta_1)$  in the CGMD generated reference state is partially affected by the chain connectivity (bond stretching energies) and excluded volume interactions, but the reference distribution is not close to the observed  $p_{obs}(\theta_1)$ . After the related statistical potential  $E(\theta_1) =$

$-k_B T \ln[p_{obs}(\theta_1)/p_{ref}(\theta_1)]$  (Eq S6) is embedded in the force field, the resultant simulated distribution,  $p_{sim}(\theta_1)$ , matches the observed  $p_{obs}(\theta_1)$  (see Fig. S1B).

Fig. S2 procedurally illustrates how the proposed iterative simulated reference state approach deals with correlation effects within three correlated torsional angles through iterative construction of the reference state and stepwise force field building. Along with embedding the energy functions of the correlated structural parameters into the force field one-by-one, the CGMD-generated reference states  $p_{ref}^{(n)}(\phi)$  ( $n = 0,1,2$ ) for illustrated torsional angle  $\phi$  were iteratively updated to change the effective potential energy  $E^{(n)}(\phi) = -k_B T \ln[p_{obs}(\phi)/p_{ref}^{(n)}(\phi)]$  at each new construction step. After the final energy function  $E(\phi) = E^{(2)}(\phi)$  is embedded into the force field, the simulated distribution  $p_{sim}(\phi)$  is consistent with the observed distribution  $p_{obs}(\phi)$  (see Fig. S2B). Compared with previous approaches that employ heuristic parameters, such as different weight coefficients for the different energy terms, the proposed iterative simulated reference state method distinguishes itself by directly treating the correlation effects, and the number of effective collective variables in the final force field is properly reduced. More details about the proposed iterative simulated reference state approach are given in our previous study.

### **Section III: Extraction of probability distributions $p_{obs}(x)$ , $p_{ref}(x)$ , and $p_{sim}(x)$**

To obtain the observed probability distributions  $p_{obs}(x)$ , all the 592 structures in the experimental PDB dataset were firstly transformed from the atomic structures into coarse-grained representations, and then the probability density  $p_{obs}(x)$  for each concerned structural parameter  $x$  in the coarse-grained representation was calculated. The statistical bin sizes for the bond length  $b$ , bond angle  $\theta$ , torsion angle  $\phi$ , and pairwise distance  $r$  are 0.01 Å, 1°, 6°, and 0.2 Å, respectively. For the pairwise distributions  $p_{obs}(r)$ , only the pairwise beads within distance  $r \leq 20$  Å are considered in the statistics. In total, under our coarse-grained conformational representation, we observed 12 bonds ( $b$ ), 18 bond angles ( $\theta$ ), 22 torsion angles ( $\phi$ ), and 55 contact

pairwise types ( $r$ ) (those components for canonical base pair interactions are not included).

To generate the reference state  $p_{ref}(x)$  (without the related energy function  $E(x)$  at work in the force field) and the simulated distribution  $p_{sim}(x)$  (with the related energy function  $E(x)$  embedded into force field) under a given force field, using the native structures in the simulated dataset (contains 121 RNA molecules) as the initial states, we performed a series of coarse-grained Molecular Dynamics (CGMD) simulations through implementing Langevin dynamics (NVT ensemble) in the modified open source software LAMMPS. The simulation time is  $t = 60$  ns at constant temperature  $T = 300$ K for each simulated structure, and the time step for integration was set to  $\Delta t = 1$ fs. After the first 50ns ( $5 \times 10^7$  simulation steps) of equilibration simulation under the given force field, the structure snapshots were collected from the last 10 ns simulation trajectories in the interval of 10ps to obtain a conformational ensemble. In total, there are 121,000 structures in this CGMD generated conformation ensemble. Using the previously mentioned statistical bin sizes, the distributions  $p_{ref}(x)$  and  $p_{sim}(x)$  for concerned structural elements ( $x$ ) were obtained based on the CGMD generated conformation ensemble.

#### **Section IV: Parameterization of energy functions in the force field**

The selection of effective collective variables for the final force field and determination of their related contributions (energy functions) into the force field are dependent on the embedded order in the proposed iterative simulated reference state approach, but the resultant total force field should be the same since the simulated distributions  $p_{sim}(x)$  guided by the final total force field remains consistent with the observed distributions  $p_{obs}(x)$  for all the structural parameters. Here, as in our previous work, we used the following embedding order to parameterize the energy functions in the force field: bond stretching and excluded volume interactions  $\rightarrow$  bond angle potentials  $\rightarrow$  torsion angle energies  $\rightarrow$  pairwise interactions.

1. We first directly determined all 18 bond stretching energies  $E_{bond}(b)$  (including 6 types for base pairing interactions) from the observed statistics  $p_{obs}(b)$  through  $E_{bond}(b) = -k_B T \ln[p_{obs}(b)]$  (here the reference state  $p_{ref}(b)$  is assumed to be constant). From the bond length geometries, the diameters ( $\sigma$ ) of all coarse-grained beads for the excluded volume interactions  $E_{LJ}(r)$  were estimated.
2. Using the bond stretching and excluded volume interactions as the basis for the force field, we parameterized the bond angle energies one-by-one through the iterative simulated reference state approach and then embedded the obtained energy functions into the force field until the simulated distributions  $p_{sim}(\theta)$  were consistent with the observed distributions  $p_{obs}(\theta)$  for all the bond angles, including those for the base pairing interactions.
3. With all the extracted bond angle energies added to the bond stretching and excluded volume interactions in our force field, the torsional angle energy functions were parametrized one-by-one through the iterative simulated reference state approach and imposed on the force field until the simulated distributions  $p_{sim}(\phi)$  matched the observed ones  $p_{obs}(\phi)$  for all the torsional angles, including those for base pairing interactions.
4. Finally, utilizing all the extracted torsional angle energies along with the bond stretching, bond angle, and excluded volume interactions in our force field, the pairwise interactions were determined step-by-step through the iterative simulated reference state approach and then embedded into the force field until the simulated distributions  $p_{sim}(r)$  were consistent with the observed statistics  $p_{obs}(r)$  for all 55 types of pairwise interactions.

To optimize the convergence speed for obtaining the targeted conformational ensemble and to minimize the number of total collective variables involved in the final CG force field, within each structural parameter category (such as all the bond angles in Step 2 above, torsional angles in Step 3, or pairwise distances in Step 4), the

structural parameter  $x$  of the largest  $|E(x)| = |-k_B T \ln[\rho_{obs}(x)/\rho_{ref}(x)]|$  is chosen as the newest collective variable for the force field in each embedded step.

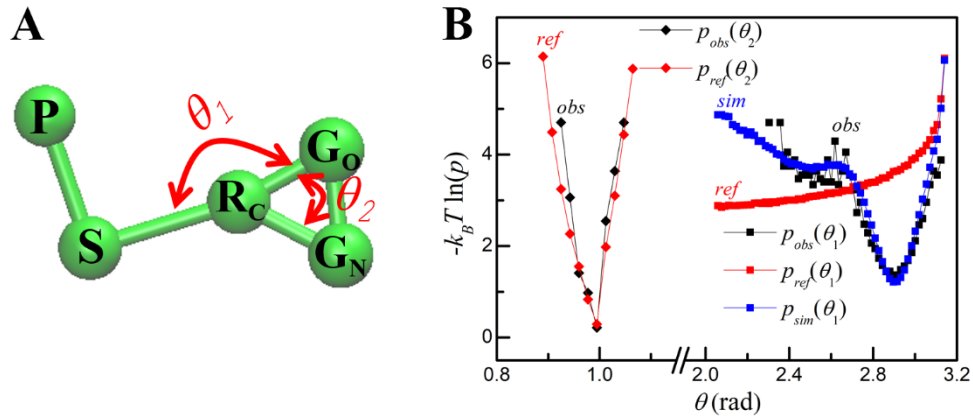

**Figure S1** Effects of chain connectivity and excluded volume in construction of coarse-grained energy functions. (A) The definition of two representative bond bending angles in the IsRNA model are shown. (B) The observed probability distributions  $p_{obs}(\theta)$  from the native structure dataset, the reference state probability distributions  $p_{ref}(\theta)$  generated by coarse-grained Molecular Dynamics (CGMD) simulations using only the bond stretching and excluded volume interactions as the force field, and the simulated Boltzmann-like distribution  $p_{sim}(\theta_1)$  from the CGMD simulation with  $E(\theta_1) = -k_B T \ln [p_{obs}(\theta_1)/p_{ref}(\theta_1)]$  also embedded into the force field are shown in black, red, and blue, respectively.



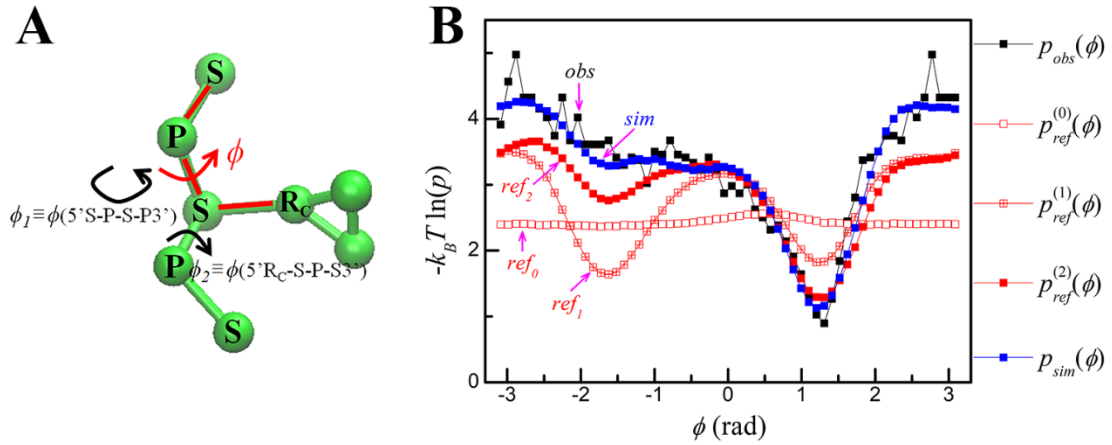

**Figure S2** Energy correlations between different structural elements recognized by the proposed iterative simulated reference state approach. (A) Definitions of a torsion angle  $\phi \equiv \phi(5'S - P - S - R_C3')$  and its two correlated torsion angles  $\phi_1 \equiv \phi(5'S - P - S - P3')$  and  $\phi_2 \equiv \phi(5'R_C - S - P - S3')$  in the lsRNA model are shown. (B) The iteratively updated reference distributions  $p_{ref}(\phi)$  for the torsion angle  $\phi$  due to the correlation effects during stepwise constructing the force field are shown in red. The  $p_{ref}^{(0)}(\phi)$  distribution is generated by CGMD simulation with the bond stretching, bond angle bending, and the LJ excluded volume interactions as force field. The  $p_{ref}^{(1)}(\phi)$  includes the correlated energy term  $E(\phi_1)$  also embedded into the force field, and  $p_{ref}^{(2)}(\phi)$  includes all the correlated energy terms  $E(\phi_1)$  and  $E(\phi_2)$  within the force field. The black squares denote the observed distribution  $p_{obs}(\phi)$  from the known structures. The blue squares indicate the simulated distribution  $p_{sim}(\phi)$  generated by the CGMD simulation with its related energy term  $E(\phi) = -k_B T \ln [p_{obs}(\phi)/p_{ref}^{(2)}(\phi)]$  embedded into the force field.

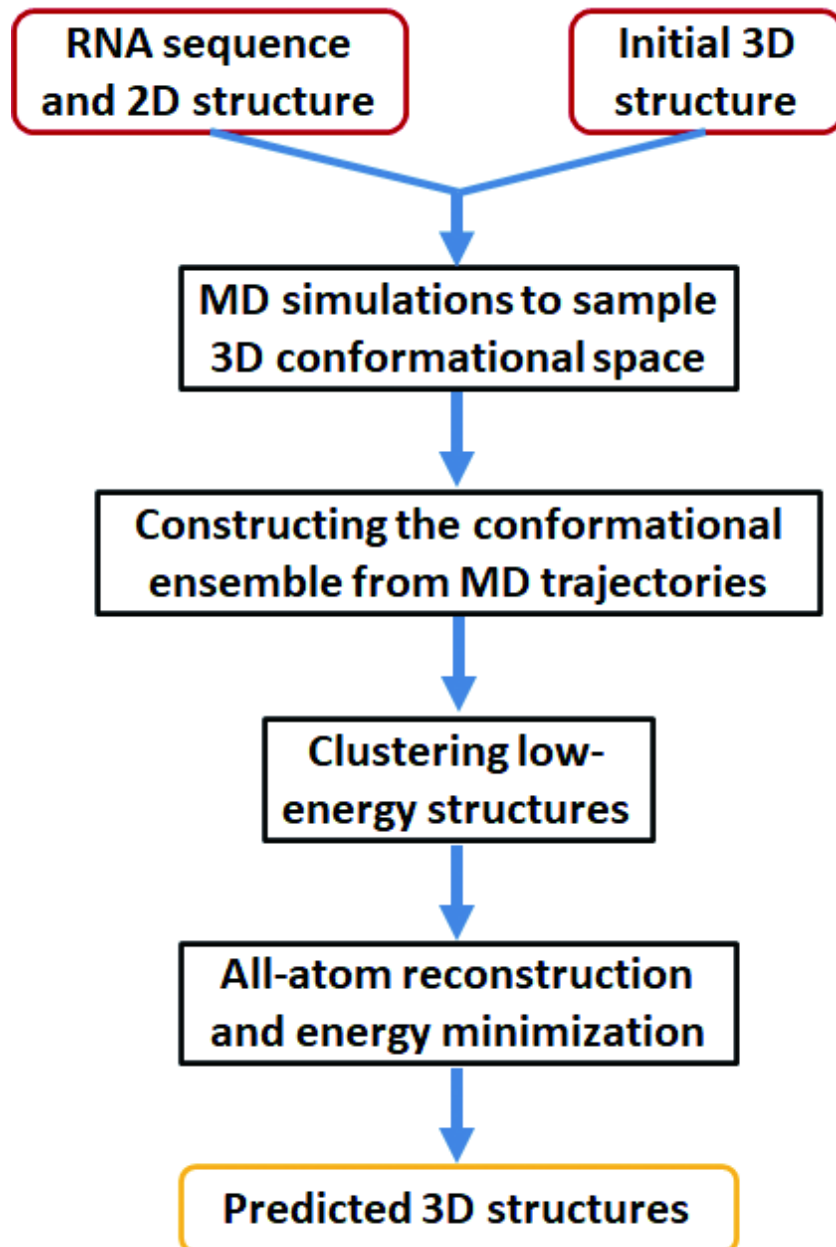

**Figure S3** Illustrative flowchart for RNA 3D structure prediction by IsRNA1 model.

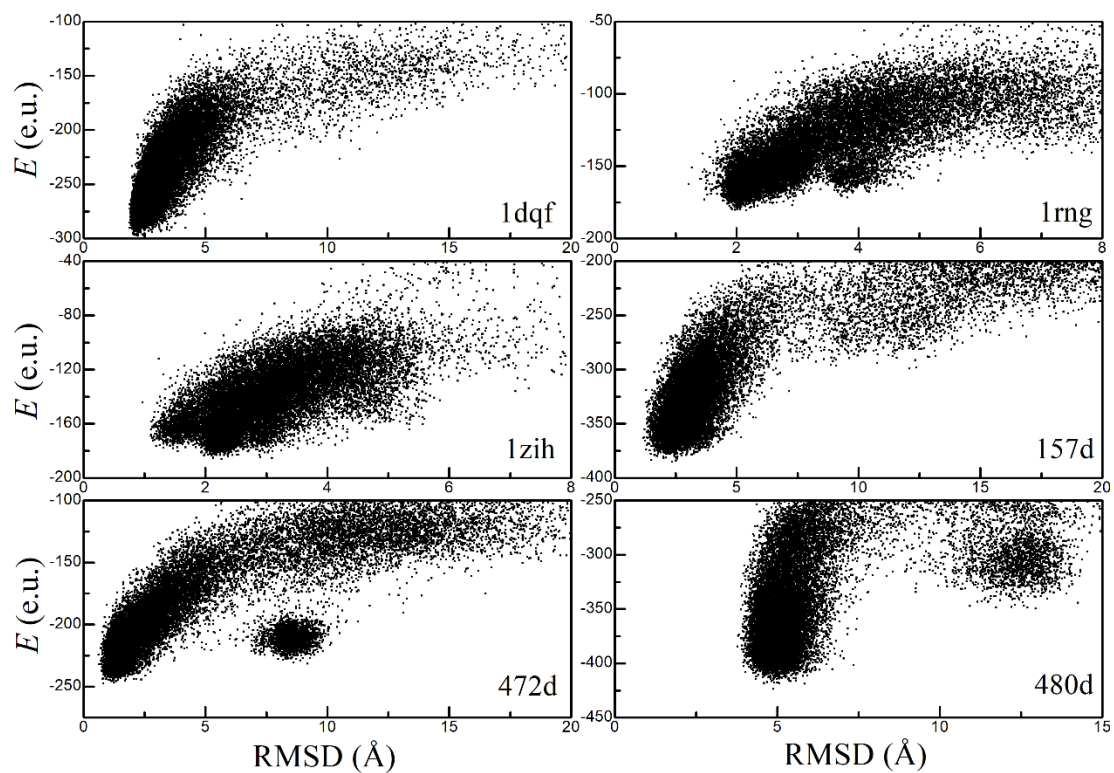

**Figure S4** Plots of RMSD (in Å) with total potential energies  $E$  (in unit e.u.) during *de novo* folding of some typical small RNA molecules with simple topologies by the IsRNA model.

**Table S1** Properties of ten types of coarse-grained beads in the IsRNA/IsRNA1 model.

| CG bead        | Mass (amu) | Diameter (Å) | Grouped heavy-atom                |
|----------------|------------|--------------|-----------------------------------|
| P              | 94.97      | 4.0          | P, OP1, OP2, O5', O3'             |
| S              | 92.05      | 3.8          | C5', C4', O4', C3', C2', O2', C1' |
| R <sub>C</sub> | 78.05      | 3.2          | N9, C8, N7, C5, C4, N3            |
| A <sub>C</sub> | 26.02      | 3.0          | C6, N6                            |
| A <sub>N</sub> | 26.02      | 3.0          | C2, N1                            |
| G <sub>O</sub> | 28.01      | 3.0          | C6, O6                            |
| G <sub>N</sub> | 40.03      | 3.0          | C2, N2, N1                        |
| Y <sub>C</sub> | 38.03      | 3.4          | N1, C5, C6                        |
| C <sub>N</sub> | 68.04      | 2.6          | C2, O2, N3, C4, N4                |
| U <sub>O</sub> | 70.03      | 2.6          | C2, O2, N3, C4, O4                |



**Table S3** Energy parameters for 18 types of bond stretching energies  $E_{bond}(b)$  in the IsRNA1 force field, in which the last 6 types are for base pairing interactions. The unit for potential energy in the IsRNA1 model is e.u.

| Type                           | $K_b$<br>(e.u./Å <sup>2</sup> ) | $b_0$<br>(Å) | $H_b$<br>(e.u.*Å) | $b_1$<br>(Å) | $\sigma_b$<br>(Å) |
|--------------------------------|---------------------------------|--------------|-------------------|--------------|-------------------|
| P-S                            | 4.249                           | 3.577        | -0.618            | 3.913        | 0.086             |
| S-R <sub>C</sub>               | 3.816                           | 4.216        | -1.667            | 4.477        | 0.226             |
| S-Y <sub>C</sub>               | 6.965                           | 3.990        | -0.499            | 3.820        | 0.145             |
| R <sub>C</sub> -A <sub>C</sub> | 271.887                         | 2.967        | -0.079            | 2.981        | 0.016             |
| R <sub>C</sub> -A <sub>N</sub> | 187.023                         | 2.867        | -0.125            | 2.881        | 0.022             |
| R <sub>C</sub> -G <sub>O</sub> | 128.131                         | 2.998        | -0.106            | 3.026        | 0.021             |
| R <sub>C</sub> -G <sub>N</sub> | 230.498                         | 3.278        | -0.068            | 3.273        | 0.015             |
| A <sub>C</sub> -A <sub>N</sub> | 81.904                          | 2.333        | -0.069            | 2.310        | 0.012             |
| G <sub>O</sub> -G <sub>N</sub> | 67.744                          | 3.018        | -0.087            | 2.998        | 0.018             |
| Y <sub>C</sub> -C <sub>N</sub> | 277.956                         | 2.027        | -0.114            | 2.048        | 0.020             |
| Y <sub>C</sub> -U <sub>O</sub> | 268.397                         | 2.033        | -0.105            | 2.045        | 0.020             |
| S-P                            | 3.766                           | 3.557        | -0.532            | 3.884        | 0.098             |
| G <sub>N</sub> -C <sub>N</sub> | 4.081                           | 3.460        | -0.312            | 3.487        | 0.169             |
| G <sub>O</sub> -C <sub>N</sub> | 0.818                           | 4.350        | -5.031            | 3.722        | 0.604             |
| A <sub>N</sub> -U <sub>O</sub> | 2.414                           | 3.609        | -1.825            | 3.280        | 0.345             |
| A <sub>C</sub> -U <sub>O</sub> | 1.718                           | 3.922        | -1.003            | 3.839        | 0.267             |
| G <sub>N</sub> -U <sub>O</sub> | 0.590                           | 4.203        | -1.435            | 4.633        | 0.336             |
| G <sub>O</sub> -U <sub>O</sub> | 3.008                           | 3.530        | -0.457            | 3.322        | 0.164             |

**Table S4** Energy parameters for 18 types of bond angle potentials  $E_{angle}(\theta)$  in the lsRNA1 force field, in which the last 6 types are for base pairing interactions. The unit for potential energy in the lsRNA1 model is e.u.

| Type                                           | $K_a$<br>(e.u./radian <sup>2</sup> ) | $\theta_0$<br>(degree) | $H_a$<br>(e.u.*radian) | $\theta_1$<br>(degree) | $\sigma_a$<br>(radian) |
|------------------------------------------------|--------------------------------------|------------------------|------------------------|------------------------|------------------------|
| P-S-P                                          | 2.226                                | 117.51                 | -1.126                 | 92.53                  | 0.268                  |
| P-S-R <sub>C</sub>                             | 2.158                                | 110.12                 | -0.867                 | 87.15                  | 0.185                  |
| P-S-Y <sub>C</sub>                             | 2.189                                | 103.93                 | -1.263                 | 74.77                  | 0.195                  |
| S-P-S                                          | 2.220                                | 107.20                 | -0.512                 | 104.56                 | 0.131                  |
| S-R <sub>C</sub> -A <sub>C</sub>               | 9.975                                | 166.04                 | -0.158                 | 165.70                 | 0.064                  |
| S-R <sub>C</sub> -A <sub>N</sub>               | 12.725                               | 116.71                 | 4.011                  | 120.49                 | 0.273                  |
| S-R <sub>C</sub> -G <sub>O</sub>               | 6.595                                | 168.97                 | -0.257                 | 164.10                 | 0.085                  |
| S-R <sub>C</sub> -G <sub>N</sub>               | 22.924                               | 109.03                 | 7.916                  | 110.35                 | 0.303                  |
| S-Y <sub>C</sub> -C <sub>N</sub>               | 1.362                                | 109.15                 | -1.151                 | 133.90                 | 0.118                  |
| S-Y <sub>C</sub> -U <sub>O</sub>               | 17.112                               | 99.12                  | -7.164                 | 143.41                 | 0.244                  |
| R <sub>C</sub> -S-P                            | 6.427                                | 108.69                 | -0.666                 | 91.85                  | 0.130                  |
| Y <sub>C</sub> -S-P                            | 4.569                                | 115.45                 | -0.630                 | 94.31                  | 0.128                  |
| G <sub>N</sub> -C <sub>N</sub> -Y <sub>C</sub> | 6.897                                | 162.89                 | -0.202                 | 157.51                 | 0.109                  |
| G <sub>O</sub> -C <sub>N</sub> -Y <sub>C</sub> | 4.593                                | 169.43                 | -0.100                 | 152.41                 | 0.083                  |
| A <sub>N</sub> -U <sub>O</sub> -Y <sub>C</sub> | 5.523                                | 174.87                 | -0.250                 | 167.42                 | 0.124                  |
| A <sub>C</sub> -U <sub>O</sub> -Y <sub>C</sub> | 5.231                                | 173.90                 | -0.086                 | 155.11                 | 0.071                  |
| G <sub>N</sub> -U <sub>O</sub> -Y <sub>C</sub> | 1.150                                | 132.24                 | -0.455                 | 128.97                 | 0.113                  |
| G <sub>O</sub> -U <sub>O</sub> -Y <sub>C</sub> | 4.642                                | 179.97                 | -0.025                 | 166.22                 | 0.037                  |

**Table S5** Energy parameters for 26 types of torsional angle energies  $E_{torsion}(\phi)$  in the lsRNA1 force field, in which the last 6 types are for base pairing interactions. The unit for potential energy in the lsRNA1 model is e.u.

| Type                                                           | $K_1$<br>(e.u.) | $\phi_1$<br>(degree) | $K_2$<br>(e.u.) | $\phi_2$<br>(degree) | $K_3$<br>(e.u.) | $\phi_3$<br>(degree) | $K_4$<br>(e.u.) | $\phi_4$<br>(degree) |
|----------------------------------------------------------------|-----------------|----------------------|-----------------|----------------------|-----------------|----------------------|-----------------|----------------------|
| P-S-P-S                                                        | 0.636           | 39.71                | 0.279           | -79.13               | 0.147           | 77.41                | 0.095           | 28.71                |
| P-S-R <sub>C</sub> -A <sub>C</sub>                             | 1.695           | -161.46              | 0.347           | -12.83               | -0.033          | -99.87               | 0.282           | -123.99              |
| P-S-R <sub>C</sub> -A <sub>N</sub>                             | 0.849           | 16.73                | 0.383           | -86.12               | 0.072           | -127.37              | 0.274           | 141.06               |
| P-S-R <sub>C</sub> -G <sub>O</sub>                             | -1.624          | 11.97                | 0.320           | -37.70               | 0.135           | -59.93               | 0.176           | -86.86               |
| P-S-R <sub>C</sub> -G <sub>N</sub>                             | 0.502           | 7.62                 | -0.584          | 108.86               | 0.106           | -88.58               | -0.252          | -6.13                |
| P-S-Y <sub>C</sub> -C <sub>N</sub>                             | 1.189           | -3.50                | 0.557           | -145.82              | 0.354           | -74.54               | -0.010          | 108.35               |
| P-S-Y <sub>C</sub> -U <sub>O</sub>                             | -1.108          | -164.15              | -0.387          | 8.08                 | 0.150           | -14.44               | 0.239           | 82.22                |
| S-P-S-P                                                        | 0.563           | -19.08               | -0.351          | 5.04                 | 0.186           | -56.32               | -0.087          | -5.21                |
| S-P-S-R <sub>C</sub>                                           | -0.613          | 20.40                | 0.231           | -105.77              | 0.149           | 3.21                 | 0.036           | -99.64               |
| S-P-S-Y <sub>C</sub>                                           | -0.551          | 9.51                 | 0.310           | -111.61              | 0.257           | 22.92                | 0.100           | 80.33                |
| S-R <sub>C</sub> -A <sub>C</sub> -A <sub>N</sub>               | -0.483          | -11.34               | 0.228           | 55.86                | -0.290          | 100.38               | 0.196           | -94.42               |
| S-R <sub>C</sub> -G <sub>O</sub> -G <sub>N</sub>               | -0.495          | -2.86                | 0.251           | 78.84                | -0.237          | 91.73                | 0.252           | -114.88              |
| R <sub>C</sub> -S-P-S                                          | 0.835           | 134.87               | -0.075          | 49.96                | 0.275           | 39.30                | 0.097           | 30.83                |
| A <sub>C</sub> -R <sub>C</sub> -S-P                            | 0.742           | 26.41                | 0.306           | 25.21                | 0.350           | -25.73               | 0.272           | -11.34               |
| A <sub>N</sub> -R <sub>C</sub> -S-P                            | -0.870          | 56.67                | -0.633          | 131.49               | 0.109           | 51.57                | 0.109           | 64.92                |
| G <sub>O</sub> -R <sub>C</sub> -S-P                            | 0.655           | 36.67                | 0.249           | 64.23                | 0.384           | -32.09               | 0.274           | -4.47                |
| G <sub>N</sub> -R <sub>C</sub> -S-P                            | 0.750           | -145.19              | 0.929           | -39.08               | 0.190           | 29.05                | -0.134          | -81.13               |
| Y <sub>C</sub> -S-P-S                                          | 0.613           | 145.30               | 0.219           | -55.23               | 0.380           | 22.98                | 0.056           | -99.01               |
| C <sub>N</sub> -Y <sub>C</sub> -S-P                            | 0.719           | -100.55              | -0.360          | 68.24                | 0.319           | 65.66                | 0.058           | 24.92                |
| U <sub>O</sub> -Y <sub>C</sub> -S-P                            | 0.848           | -101.99              | 0.488           | -127.77              | 0.282           | 53.57                | -0.050          | 50.53                |
| R <sub>C</sub> -G <sub>O</sub> -G <sub>N</sub> -C <sub>N</sub> | -0.783          | -12.03               | 0.137           | -117.40              | 0.621           | 1.78                 | -0.826          | -0.17                |
| G <sub>N</sub> -G <sub>O</sub> -C <sub>N</sub> -Y <sub>C</sub> | 0.218           | -118.55              | -0.199          | -95.23               | 0.104           | -40.39               | -0.128          | 10.37                |



|                                                                |        |        |        |        |        |       |        |        |
|----------------------------------------------------------------|--------|--------|--------|--------|--------|-------|--------|--------|
| R <sub>C</sub> -A <sub>C</sub> -A <sub>N</sub> -U <sub>O</sub> | -0.674 | -6.70  | 0.194  | 175.55 | 0.560  | 0.69  | -0.726 | 0.23   |
| A <sub>C</sub> -A <sub>N</sub> -U <sub>O</sub> -Y <sub>C</sub> | 0.426  | 159.40 | -0.111 | 10.03  | 0.133  | 35.07 | -0.080 | -49.79 |
| R <sub>C</sub> -G <sub>O</sub> -G <sub>N</sub> -U <sub>O</sub> | -0.666 | -3.38  | 0.041  | -64.11 | 0.543  | 1.38  | -0.793 | -0.11  |
| G <sub>N</sub> -G <sub>O</sub> -U <sub>O</sub> -Y <sub>C</sub> | 0.119  | 135.22 | 0.373  | 165.99 | -0.186 | 18.33 | -0.036 | 6.25   |

**Table S6** Energy parameters for 41 types of pairwise interactions  $E_{pair}(r)$  in the lsRNA1 force field. The unit for potential energy in the lsRNA1 model is e.u.

| Type                            | $D_0$ | $\alpha$ | $r_0$ | $H_1$  | $r_1$ | $\sigma_1$ | $H_2$  | $r_2$  | $\sigma_2$ | $r_{cut}$ |
|---------------------------------|-------|----------|-------|--------|-------|------------|--------|--------|------------|-----------|
| P--P                            | 0.034 | 0.369    | 9.061 | -0.431 | 5.903 | 0.351      | 0.700  | 6.451  | 1.197      | 9.4       |
| P--A <sub>N</sub>               | 0.176 | 2.148    | 4.140 | 0.241  | 7.774 | 0.324      | 0.363  | 10.461 | 0.771      | 12.6      |
| P--G <sub>N</sub>               | 0.095 | 0.298    | 8.972 | -0.310 | 6.090 | 0.472      | 0.489  | 10.503 | 0.935      | 12.5      |
| P--C <sub>N</sub>               | 0.067 | 0.326    | 8.095 | 0.183  | 7.765 | 0.589      | 0.363  | 11.200 | 0.964      | 13.5      |
| S--S                            | 0.044 | 0.531    | 6.401 | 0.513  | 5.382 | 0.549      | 0.055  | 7.218  | 0.132      | 7.7       |
| S--R <sub>C</sub>               | 0.099 | 0.247    | 8.593 | 0.647  | 7.413 | 0.414      | 0.726  | 10.266 | 0.902      | 12.6      |
| S--G <sub>N</sub>               | 0.455 | 0.507    | 5.180 | -0.970 | 3.802 | 0.499      | 0.178  | 10.798 | 0.521      | 12.2      |
| S--U <sub>O</sub>               | 0.937 | 1.062    | 3.857 | -0.909 | 6.951 | 1.323      | 0.145  | 11.291 | 0.333      | 12.2      |
| R <sub>C</sub> --R <sub>C</sub> | 2.915 | 0.975    | 3.837 | 8.378  | 3.904 | 1.253      | -0.375 | 6.089  | 0.156      | 10.0      |
| R <sub>C</sub> --A <sub>C</sub> | 0.182 | 2.449    | 3.867 | 0.580  | 5.897 | 0.663      | -0.345 | 6.472  | 0.348      | 8.0       |
| R <sub>C</sub> --A <sub>N</sub> | 0.038 | 0.303    | 9.076 | -1.120 | 3.448 | 0.363      | 0.456  | 8.963  | 0.581      | 10.6      |
| R <sub>C</sub> --G <sub>O</sub> | 0.131 | 1.401    | 4.071 | 0.119  | 5.937 | 0.253      | -0.246 | 7.097  | 0.353      | 8.2       |
| R <sub>C</sub> --G <sub>N</sub> | 0.336 | 2.098    | 3.376 | -0.274 | 6.806 | 0.404      | -0.112 | 10.380 | 0.305      | 11.3      |
| R <sub>C</sub> --Y <sub>C</sub> | 0.502 | 1.699    | 3.615 | 0.274  | 5.908 | 0.314      | 0.258  | 8.913  | 0.487      | 10.4      |
| R <sub>C</sub> --C <sub>N</sub> | 0.376 | 0.648    | 4.795 | 0.859  | 5.128 | 0.556      | 0.220  | 6.356  | 0.227      | 11.0      |
| A <sub>C</sub> --A <sub>C</sub> | 1.126 | 0.739    | 3.990 | 3.100  | 4.484 | 1.008      | 0.409  | 7.725  | 0.565      | 10.2      |
| A <sub>C</sub> --A <sub>N</sub> | 0.192 | 2.100    | 3.569 | 0.537  | 5.460 | 0.572      | 0.155  | 9.018  | 0.348      | 10.0      |
| A <sub>C</sub> --G <sub>O</sub> | 0.197 | 5.134    | 3.359 | -0.239 | 5.739 | 0.128      | -0.297 | 7.374  | 0.527      | 8.9       |
| A <sub>C</sub> --G <sub>N</sub> | 0.510 | 0.486    | 4.920 | 0.882  | 6.002 | 0.716      | 0.381  | 9.172  | 0.659      | 10.7      |
| A <sub>C</sub> --Y <sub>C</sub> | 0.818 | 0.728    | 4.039 | 3.592  | 5.215 | 1.303      | -0.529 | 6.564  | 0.386      | 8.8       |
| A <sub>C</sub> --C <sub>N</sub> | 0.630 | 0.512    | 4.556 | 1.619  | 5.321 | 0.880      | 0.406  | 8.644  | 0.652      | 10.3      |
| A <sub>C</sub> --U <sub>O</sub> | 0.561 | 1.835    | 3.357 | -0.451 | 6.590 | 0.529      | -0.232 | 9.784  | 0.567      | 11.6      |
| A <sub>N</sub> --A <sub>N</sub> | 0.103 | 1.278    | 4.181 | 2.397  | 6.103 | 1.513      | -1.482 | 6.536  | 0.530      | 10.3      |
| A <sub>N</sub> --G <sub>O</sub> | 0.573 | 2.094    | 3.431 | 0.681  | 4.869 | 0.898      | -0.191 | 6.835  | 0.257      | 7.7       |
| A <sub>N</sub> --G <sub>N</sub> | 0.437 | 0.625    | 4.672 | 2.247  | 5.482 | 0.412      | -1.972 | 5.466  | 0.299      | 10.0      |
| A <sub>N</sub> --Y <sub>C</sub> | 0.247 | 1.519    | 3.708 | 0.334  | 6.036 | 0.466      | -0.547 | 6.788  | 0.955      | 9.5       |
| A <sub>N</sub> --C <sub>N</sub> | 0.813 | 0.632    | 4.356 | 2.493  | 5.281 | 1.110      | 0.420  | 8.681  | 0.579      | 10.2      |
| A <sub>N</sub> --U <sub>O</sub> | 0.524 | 1.459    | 3.617 | 0.911  | 5.457 | 0.664      | -0.297 | 7.940  | 0.506      | 9.6       |
| G <sub>O</sub> --G <sub>O</sub> | 0.188 | 1.013    | 3.930 | 0.527  | 5.176 | 0.716      | 0.222  | 8.439  | 0.618      | 10.0      |
| G <sub>O</sub> --Y <sub>C</sub> | 0.785 | 0.670    | 4.133 | 2.730  | 4.778 | 1.195      | 0.390  | 8.686  | 0.598      | 10.5      |
| G <sub>O</sub> --C <sub>N</sub> | 0.012 | 3.637    | 3.534 | -0.416 | 5.679 | 0.195      | -0.321 | 7.446  | 0.409      | 8.6       |
| G <sub>O</sub> --U <sub>O</sub> | 0.757 | 1.829    | 3.385 | -0.171 | 6.473 | 0.221      | 0.210  | 8.273  | 0.410      | 9.5       |
| G <sub>N</sub> --Y <sub>C</sub> | 0.508 | 1.636    | 3.657 | 0.309  | 4.553 | 0.268      | -0.250 | 7.332  | 0.313      | 8.2       |
| G <sub>N</sub> --C <sub>N</sub> | 0.188 | 2.265    | 3.543 | 1.254  | 4.984 | 0.826      | -0.192 | 7.096  | 0.236      | 7.8       |
| G <sub>N</sub> --U <sub>O</sub> | 0.358 | 1.096    | 4.016 | 0.263  | 4.795 | 0.301      | -0.402 | 5.422  | 0.165      | 7.7       |
| Y <sub>C</sub> --Y <sub>C</sub> | 0.046 | 1.051    | 4.335 | 0.684  | 4.531 | 0.393      | -0.477 | 6.721  | 0.736      | 9.0       |
| Y <sub>C</sub> --C <sub>N</sub> | 0.133 | 0.486    | 7.097 | -2.494 | 3.531 | 0.401      | 0.435  | 8.614  | 0.599      | 10.1      |
| Y <sub>C</sub> --U <sub>O</sub> | 0.176 | 0.456    | 5.839 | 1.619  | 5.819 | 0.823      | 0.276  | 9.463  | 0.484      | 11.9      |
| C <sub>N</sub> --C <sub>N</sub> | 0.576 | 0.636    | 4.701 | 2.278  | 5.558 | 0.692      | 0.479  | 8.904  | 0.435      | 10.3      |
| C <sub>N</sub> --U <sub>O</sub> | 0.359 | 0.600    | 4.529 | 0.967  | 5.390 | 0.539      | 0.352  | 9.046  | 0.440      | 10.3      |
| U <sub>O</sub> --U <sub>O</sub> | 1.158 | 0.485    | 4.686 | 3.559  | 5.431 | 0.930      | 0.844  | 9.227  | 0.745      | 11.2      |

**Table S7** Summary of simulation details for each study in this work. Simulation technique: cMD is conventional Molecular Dynamics, SA MD is simulated annealing Molecular Dynamics, and REMD is replica-exchange Molecular Dynamics.

| Studies (Number of cases)                                                | Length (nts) | Simulation length, technique, and temperature                                                    | Initial structure                                                  | Obtainment of conformation ensemble and Output                                                                                                                                                                                                                                                         | CPU time (hours) |
|--------------------------------------------------------------------------|--------------|--------------------------------------------------------------------------------------------------|--------------------------------------------------------------------|--------------------------------------------------------------------------------------------------------------------------------------------------------------------------------------------------------------------------------------------------------------------------------------------------------|------------------|
| Parameterization of energy functions in IsRNA1 (121)                     | 12~120       | 60ns cMD at T=300K                                                                               | Native structures                                                  | First 50ns for relaxation, collect structure snapshots every 10ps in last 10 ns for statistics                                                                                                                                                                                                         | 0.8~7            |
| De novo folding of small RNA in IsRNA (15)                               | 12~36        | 50ns SA MD with T=1000K to 350K, then 500ns SA MD with T=350K to 200K, final 500ns cMD at T=200K | Coil states by unfolded the native structures at T=1000K with 10ns | First 550ns for folding of structure, take snapshots every 100ps in last 500ns. the top 10% lowest potential structures of collected snapshots were clustered, the centroid structure of the largest cluster was chosen as prediction                                                                  | 21~68            |
| 3D structure predictions with 2D structures as constraints by IsRNA (65) | 22~78        | 300ns REMD with 8 replicas and temperature uniformly range from T=200K to 375K                   | Coil states by unfolded the native structures at T=1000K with 10ns | First 200ns for folding of structure, collect structures for the conformational ensemble every 100ps in the last 100ns for each replica. Top 10% lowest potential structures make the conformation ensemble for clustering, the centroid structure of the largest cluster was chosen as the prediction | 72~384           |
| Refined 3D structure predictions by IsRNA1 (65)                          | 22~78        | 10ns REMD with 11 replicas and temperature uniformly range from T=150K to 400K                   | Predicted structures given by IsRNA                                | First 50ns for relaxation, collect snapshots every 100ps in the last 50ns for each replica, top 10% lowest potential snapshots give the conformation ensemble for clustering process, the centroid of the largest cluster was chosen as the prediction                                                 | 39~154           |

|                                                                   |        |                                                                                                                                                                                                      |                                                          |                                                                                                                                                                                                                                                                     |                   |         |
|-------------------------------------------------------------------|--------|------------------------------------------------------------------------------------------------------------------------------------------------------------------------------------------------------|----------------------------------------------------------|---------------------------------------------------------------------------------------------------------------------------------------------------------------------------------------------------------------------------------------------------------------------|-------------------|---------|
| Large-scale benchmark on 3D structure predictions by IsRNA1 (130) | 40~161 | A predefined 30ns REMD simulation with 10 replicas and temperature T=225K to 450K to refold the tertiary base pairs; 50 ns REMD with 10 replicas and temperature uniformly range from T=200K to 420K | Top 3 predictions generated by Vfold3D/VfoldLA algorithm | First 25ns for relaxation, collect snapshots every 50ps in the last 25ns for each replica, top 10% lowest potential snapshots give the conformation ensemble for clustering process, the centroid structures of the top largest clusters were chosen as predictions | Top 3 prediction  | 85~200  |
| 3D structure predictions on RNA Puzzle by IsRNA1 (21)             | 41~188 |                                                                                                                                                                                                      |                                                          |                                                                                                                                                                                                                                                                     | Top 5 predictions | 95~645  |
| Structure filtration for predictions in RNA Puzzle by IsRNA1 (21) | 41~188 | 0.5ns cMD at T=300K with integration timestep $\Delta t = 0.5fs$ , 5 duplicates per prediction                                                                                                       | All predictions in RNA Puzzle                            | Energy minimization firstly, collect structure snapshots every 0.5ps, snapshots within RMSD = 5Å from the initial structure are used for energy average                                                                                                             |                   | 0.3~1.5 |

**Table S8** Tertiary folding of medium size RNA molecules with the assistance of 2D structures by IsRNA-IsRNA1 pipeline and comparison with SimRNA. The top 1 candidate structure is chosen as the predicted structure and the RMSD (in Å) is calculated over all heavy-atoms. For SimRNA, the data are collected from the original paper if available, otherwise, the top 1 prediction is given by the SimRNAweb (<https://genesilico.pl/SimRNAweb/>) at the default parameters is chosen. The best predictions with lowest RMSD over three models (SimRNA, IsRNA, and IsRNA1) are **boldfaced**.

| PDB id | Length | Topology       | SimRNA      | IsRNA       | IsRNA1       |
|--------|--------|----------------|-------------|-------------|--------------|
| 2g1w   | 22     | pseudoknot     | <b>4.64</b> | 5.10        | 4.67         |
| 1k2g   | 22     | stem-loop      | <b>3.38</b> | 5.68        | 4.51         |
| 1nc0   | 24     | stem-loop      | 5.46        | <b>5.27</b> | 5.62         |
| 2a43   | 26     | pseudoknot     | <b>3.65</b> | 4.33        | 4.83         |
| 2rp1   | 27     | pseudoknot     | 4.13        | 3.78        | <b>3.40</b>  |
| 1l2x   | 27     | pseudoknot     | <b>3.90</b> | 4.66        | 4.31         |
| 1fqz   | 27     | stem-loop      | 5.27        | 4.91        | <b>4.88</b>  |
| 1ysv   | 27     | stem-loop      | <b>1.40</b> | 1.51        | 2.27         |
| 1q9a   | 27     | stem-loop      | <b>4.49</b> | 4.60        | 5.13         |
| 1kpz   | 28     | pseudoknot     | <b>4.01</b> | 4.24        | 4.72         |
| 2ap5   | 28     | pseudoknot     | <b>4.14</b> | 6.22        | 4.95         |
| 1yg4   | 28     | pseudoknot     | <b>4.27</b> | 6.14        | 5.07         |
| 2ldz   | 30     | stem-loop      | 4.86        | 3.86        | <b>3.42</b>  |
| 1kp7   | 30     | stem-loop      | 5.86        | <b>4.73</b> | 4.82         |
| 1na2   | 30     | stem-loop      | <b>3.17</b> | 4.50        | 4.07         |
| 1rfr   | 30     | stem-loop      | <b>2.63</b> | 2.64        | 2.87         |
| 2n6q   | 31     | pseudoknot     | <b>3.03</b> | 3.61        | 3.15         |
| 1ylg   | 31     | stem-loop      | 3.23        | <b>2.74</b> | 3.92         |
| 1kpd   | 32     | pseudoknot     | 6.89        | 6.34        | <b>6.05</b>  |
| 1kaj   | 32     | pseudoknot     | 9.05        | <b>8.86</b> | 9.04         |
| 2kyd   | 32     | stem-loop      | 2.22        | 2.01        | <b>1.71</b>  |
| 2jxv   | 33     | stem-loop      | 3.50        | <b>2.57</b> | 2.89         |
| 1rnk   | 34     | pseudoknot     | 6.59        | 6.11        | <b>5.31</b>  |
| 2kpv   | 34     | stem-loop      | 2.85        | 2.90        | <b>2.84</b>  |
| 1p5n   | 34     | stem-loop      | 4.45        | <b>4.20</b> | 4.29         |
| 1nbk   | 34     | stem-loop      | <b>4.50</b> | 6.27        | 4.66         |
| 2jtp   | 34     | stem-loop      | 3.54        | <b>3.38</b> | 3.94         |
| 1e95   | 36     | pseudoknot     | <b>3.29</b> | 4.64        | 3.55         |
| 2tpk   | 36     | pseudoknot     | <b>3.04</b> | 3.28        | 3.57         |
| 3gm7   | 36     | stem-loop      | 2.19        | 5.97        | <b>2.06</b>  |
| 1b36   | 38     | stem-loop      | 8.76        | <b>7.96</b> | 8.17         |
| 2a9l   | 38     | stem-loop      | 11.55       | 10.80       | <b>10.54</b> |
| 4e5c   | 38     | stem-loop      | 2.82        | 3.19        | <b>2.41</b>  |
| 3szx   | 38     | stem-loop      | 2.18        | 3.39        | <b>1.93</b>  |
| 1txs   | 38     | stem-loop      | <b>3.14</b> | 4.31        | 3.83         |
| 299d   | 41     | 3-way junction | 6.96        | <b>6.83</b> | 10.73        |

|                             |    |                |              |              |              |
|-----------------------------|----|----------------|--------------|--------------|--------------|
| 1zc5                        | 41 | stem-loop      | 2.85         | 2.50         | <b>2.01</b>  |
| 2l2j                        | 42 | stem-loop      | 3.54         | <b>2.52</b>  | 2.57         |
| 2fey                        | 43 | stem-loop      | 7.18         | 6.04         | <b>4.74</b>  |
| 1cq5                        | 43 | stem-loop      | <b>3.97</b>  | 4.66         | 4.54         |
| 1a60                        | 44 | pseudoknot     | 6.76         | <b>5.85</b>  | 6.23         |
| 1z2j                        | 45 | stem-loop      | 4.11         | 4.13         | <b>3.77</b>  |
| 1xjr                        | 46 | stem-loop      | <b>9.38</b>  | 10.02        | 10.30        |
| 1ymo                        | 47 | triplex        | <b>5.74</b>  | 6.54         | 5.83         |
| 2p89                        | 48 | 3-way junction | 9.65         | <b>6.58</b>  | 7.27         |
| 2ke6                        | 48 | stem-loop      | 4.42         | <b>3.20</b>  | 4.68         |
| 2kur                        | 48 | stem-loop      | 4.13         | <b>3.56</b>  | 4.73         |
| 2m8k                        | 48 | triplex        | 4.54         | 4.45         | <b>3.80</b>  |
| 2pcw                        | 49 | 3-way junction | 14.87        | 11.46        | <b>7.46</b>  |
| 1rmn                        | 49 | 3-way junction | <b>12.73</b> | 15.54        | 14.69        |
| 2lu0                        | 49 | 3-way junction | <b>7.40</b>  | 7.46         | 8.46         |
| 3e5f                        | 52 | 3-way junction | 12.47        | 13.68        | <b>10.96</b> |
| 2mhi                        | 53 | 3-way junction | 15.66        | 17.25        | <b>14.85</b> |
| 4kz2                        | 54 | 3-way junction | 10.85        | 16.34        | <b>9.07</b>  |
| 1p5m                        | 55 | stem-loop      | <b>4.69</b>  | 7.18         | 6.66         |
| 3r4f                        | 66 | 3-way junction | 15.35        | 17.41        | <b>7.89</b>  |
| 3slm                        | 66 | tertiary       | <b>6.24</b>  | 8.18         | 7.17         |
| 2qus                        | 68 | 3-way junction | <b>5.68</b>  | 7.72         | 9.09         |
| 2gm0                        | 70 | stem-loop      | 6.97         | <b>5.84</b>  | 6.32         |
| 2n8v                        | 70 | tertiary       | 14.03        | 10.32        | <b>7.16</b>  |
| 1y26                        | 71 | tertiary       | 10.07        | <b>6.74</b>  | 7.06         |
| 3l0u                        | 73 | tRNA           | 12.97        | <b>12.48</b> | 14.50        |
| 1zo3                        | 76 | tRNA           | 17.90        | <b>11.23</b> | 14.19        |
| 1p5p                        | 77 | stem-loop      | 12.12        | 8.82         | <b>8.16</b>  |
| 2d1a                        | 78 | stem-loop      | 10.51        | <b>5.40</b>  | 7.16         |
| Average (Small size group)  |    |                | 4.35±2.11    | 4.70±1.91    | 4.38±1.88    |
| Average (Large size group)  |    |                | 8.79±4.27    | 8.33±4.36    | 7.74±3.50    |
| Average (Stem-loop group)   |    |                | 4.86±2.73    | 4.74±2.21    | 4.60±2.23    |
| Average (Pseudoknot group)  |    |                | 4.81±1.80    | 5.22±1.48    | 4.92±1.51    |
| Average (Complicated group) |    |                | 10.77±4.13   | 10.60±4.23   | 9.42±3.37    |
| Average (Total)             |    |                | 6.40±3.95    | 6.38±3.73    | 5.93±3.21    |

**Table S11** Blind screening of good predictions in RNA-Puzzles challenges by the IsRNA1 protocol without knowledge of native structures given in prior: challenge # and PDB id, RNA molecule size (column “Length”), number of submitted models by various groups (column “Number of models”), the range of RMSDs over all the submitted models (column “Predicted RMSD”), the range of Interaction Network Fidelity for canonical base pairing interaction  $INF_{wc}$  over all the predictions (column “Predicted  $INF_{wc}$ ”), the Pearson correlation coefficient between potential energies  $E$  evaluated by IsRNA1 protocol and RMSDs (column “ $R(E, RMSD)$ ”), the Pearson correlation coefficient between potential energies  $E$  and values of  $INF_{wc}$  (column “ $R(E, INF_{wc})$ ”), sensitivity TPR for the fraction of actual good predictions caught by the filtration protocol (column “TPR”), precision PPV for the fraction of corrected predictions over the guessed good predictions by the filtration protocol (column “PPV”), fraction S that is classified as actual good predictions over all the submissions (column “S”), and fraction P that is filtered as good predictions over all the submissions (column “P”). Values in *parentheses* in columns “TPR”, “PPV”, “S”, and “P” are the results that adopt 2D structure filtration before screening by removing the predictions with  $INF_{wc} < 0.8$  before the blind 3D structure screening by the present IsRNA1 protocol.

| Puzzle (PDB id) | Length (nt) | Number of models | Predicted RMSD (Å) | Predicted $INF_{wc}$ | $R(E, RMSD)$ | $R(E, INF_{wc})$ | TPR         | PPV         | S           | P           |
|-----------------|-------------|------------------|--------------------|----------------------|--------------|------------------|-------------|-------------|-------------|-------------|
| 1 (3mei)        | 46          | 14               | 3.4~7.2            | 0.73~0.97            | 0.14         | -0.82            | 0.57 (0.62) | 1.0 (1.0)   | 1.0 (1.0)   | 0.57 (0.62) |
| 3 (3owz)        | 84          | 12               | 7.7~24.7           | 0.39~0.94            | 0.60         | -0.86            | 0.80 (0.80) | 0.67 (0.67) | 0.42 (0.50) | 0.50 (0.60) |
| 5 (4p8z)        | 188         | 25               | 9.0~36.2           | 0.66~0.94            | 0.72         | -0.67            | 1.0 (1.0)   | 0.18 (0.18) | 0.08 (0.10) | 0.44 (0.52) |
| 6 (4gxy)        | 168         | 34               | 11.6~37.4          | 0.64~0.90            | -0.01        | -0.23            | 0.57 (0.57) | 0.44 (0.57) | 0.21 (0.28) | 0.26 (0.28) |
| 7 (4r4p)        | 185         | 52               | 20.3~60.6          | 0.45~0.93            | 0.43         | -0.80            | 0.60 (0.60) | 0.60 (0.60) | 0.19 (0.29) | 0.19 (0.29) |
| 8 (4l81)        | 96          | 42               | 4.8~31.3           | 0.30~0.98            | 0.60         | -0.63            | 0.75 (0.75) | 0.20 (0.20) | 0.10 (0.11) | 0.36 (0.42) |
| 9 (5kpy)        | 71          | 32               | 6.1~25.4           | 0.73~0.92            | -0.18        | 0.03             | 0.28 (0.29) | 0.64 (0.78) | 0.78 (0.86) | 0.34 (0.32) |
| 10 tBox (4lck)  | 96          | 26               | 6.0~18.5           | 0.78~0.94            | 0.37         | -0.42            | 1.0 (1.0)   | 0.40 (0.43) | 0.23 (0.25) | 0.58 (0.58) |
| 11 X-ray (5lys) | 57          | 54               | 5.0~16.1           | 0.60~1.0             | 0.18         | -0.34            | 0.56 (0.68) | 0.96 (0.88) | 0.83 (0.81) | 0.48 (0.62) |
| 12 (4qlm)       | 125         | 51               | 10.1~36.6          | 0.20~0.89            | 0.80         | -0.81            | 0.40 (0.56) | 0.77 (0.67) | 0.49 (0.51) | 0.25 (0.43) |
| 13              | 71          | 55               | 5.4~31.0           | 0.0~0.95             | 0.24         | -0.56            | 0.20 (0.20) | 0.18 (0.22) | 0.18 (0.28) | 0.20 (0.25) |
| 14 Bound (5ddp) | 61          | 64               | 5.1~17.5           | 0.78~0.94            | -0.05        | 0.19             | 0.08 (0.08) | 0.10 (0.10) | 0.20 (0.21) | 0.16 (0.16) |
| 14 Free (5ddo)  | 61          | 52               | 6.9~23.1           | 0.75~0.91            | 0.34         | 0.28             | 0.40 (0.32) | 0.67 (0.70) | 0.48 (0.51) | 0.29 (0.23) |
| 15 (5di4)       | 68          | 64               | 7.1~24.8           | 0.05~0.85            | 0.55         | -0.21            | 0.56 (0.63) | 0.38 (0.36) | 0.28 (0.47) | 0.41 (0.82) |
| 17 (5k7c)       | 62          | 68               | 7.2~21.8           | 0.10~0.86            | 0.22         | -0.62            | 0.54 (0.60) | 0.33 (0.60) | 0.19 (0.48) | 0.31 (0.48) |
| 18 (5tpy)       | 71          | 57               | 3.2~24.9           | 0.29~0.98            | -0.18        | -0.04            | 0.0 (0.91)  | 0.0 (0.77)  | 0.19 (0.65) | 0.35 (0.76) |
| 19 (5t5a)       | 62          | 54               | 5.5~22.4           | 0.27~0.98            | 0.20         | -0.16            | 0.38 (1.0)  | 0.33 (0.44) | 0.15 (0.31) | 0.17 (0.69) |
| 20 (5y85)       | 68          | 55               | 4.7~25.4           | 0.0~1.0              | 0.27         | -0.48            | 0.50 (0.50) | 0.19 (0.21) | 0.18 (0.29) | 0.47 (0.71) |

|           |    |    |          |           |      |       |             |             |             |             |
|-----------|----|----|----------|-----------|------|-------|-------------|-------------|-------------|-------------|
| 21 (5nz6) | 41 | 46 | 3.8~18.1 | 0.39~0.91 | 0.33 | -0.30 | 0.44 (0.44) | 0.89 (1.0)  | 0.39 (0.82) | 0.20 (0.36) |
| Average   |    |    |          |           | 0.29 | -0.39 | 0.51 (0.61) | 0.47 (0.55) | 0.35 (0.46) | 0.34 (0.48) |
